# Supplementary material for: Analysis of macular microvasculature with optical coherence tomography angiography for migraine: A systematic review and meta-analysis
Source: Frontiers journal article supplement (doi:10.3389/fneur.2022.1001304), 2022-10-13
Supplement: Data_Sheet_1.zip [file Supplementary Table 1.xlsx]

## Sheet: Sheet1
Supplementary Table 1. Summary of the assessment of the risk of bias of the included studies (Newcastle-Ottawa Scale adapted for cross-sectional studies).
Author, year	1	2	3	4	5	6	7
Melinda Y. Chang,2017	*	-	*	-	**	*	*
Mahmut Oğuz Ulusoy,2019	*	-	*	-	**	-	*
Pınar Bingöl Kızıltunç,2020	*	-	-	-	**	*	*
Nurdan Gamze Taşlı,2020	*	*	*	-	**	*	*
Özlem Güler,2020	*	-	*	-	**	*	*
Gamze Dereli Can,2020	*	*	*	-	**	*	*
Mualla S. Hamurcu,2021	*	-	-	-	**	*	*
Mehmet Hamamci,2021	*	*	*	-	**	*	*
M. Karahan,2021	*	*	-	-	**	*	*
“*” stands for one score; “-” stands for no score;
