# Supplementary material for: Analysis of macular microvasculature with optical coherence tomography angiography for migraine: A systematic review and meta-analysis
Source: Frontiers journal article supplement (doi:10.3389/fneur.2022.1001304), 2022-10-13
Supplement: Data_Sheet_1.zip [file Supplementary Table 2.xlsx]

## Sheet: Sheet2
Supplementary Table 2 - OCTA devices, parameters, and calculation method as defined by the authors.
Author		OCTA device		Macular scan size (mm)		Foveal region (mm)	Parafoveal region(mm)	Image processing		OCTA parameters
Melinda Y . Chang et al.		Optovue		3×3		1	NA	AngioVue		VD(mm-1): Whole macular image/ Fovea in the SCP / DCP; FAZ (mm2)
Mahmut Oğuz Ulusoy et al.		Optovue		6×6		0.6	0.6~2.5	AngioVue		VD(%): Whole macular image/ Fovea/Parafovea/Perifovea/Superior hemisphere/Inferior hemisphere in the SCP / DCP; FAZ (mm2)
Nurdan Gamze Taşlı et al.		NIDEK		3×3		NA	NA	NIDEK		VD(mm-1):Whole macular image/ Inner layer/Outer layer in the SCP / DCP; FAZ (mm2)
Özlem Güler et al.		Optovue		6×6		1	1~3	AngioVue		VD(%): Whole macular image/ Fovea/Parafovea/Superior hemisphere/Inferior hemisphere in SCP / DCP; Flow density(%): SCP/DCP/Outer retinal capillary plexus/ Choriocapillaris layers
Gamze Dereli Can et al.		Optovue		3×3		0.6	0.6~2.5	AngioVue		VD(%): Whole macular image/ Fovea/Parafovea/Perifovea/Superior hemisphere/Inferior hemisphere in SCP / DCP; FAZ (mm2)
Pınar Bingöl Kızıltunç et al.		Optovue		6×6		1	1~3	AngioVue		VD(%): Whole macular image/ Fovea/Parafovea/Perifovea in the SCP / DCP; FAZ (mm2)
Mualla S. Hamurcu et al.		Optovue		3×3		NA	NA	AngioVue		VD(%): Superior/Inferior/Temporal/Nasal hemisphere in the SCP; FAZ (mm2)
Mehmet Hamamci et al.		Optovue		6×6		1	1~3	AngioVue		VD(%): Whole macular image/ Fovea/Parafovea/Perifovea/Superior hemisphere/Inferior hemisphere in the SCP / DCP; FAZ (mm2)
M. Karahan et al.		Optovue		3×3		1	1~3	AngioVue		VD(%): Whole macular image/ Fovea/Parafovea/Superior hemisphere/Inferior hemisphere in the SCP / DCP; FAZ (mm2)
VD, vessel density; FAZ, foveal avascular zone; SCP, superficial retinal capillary plexus; DCP, deep retinal capillary plexus; NA, not available;
