# Supplementary material for: Analysis of macular microvasculature with optical coherence tomography angiography for migraine: A systematic review and meta-analysis
Source: Frontiers journal article supplement (doi:10.3389/fneur.2022.1001304), 2022-10-13
Supplement: Data_Sheet_1.zip [file Supplementary Table 3.xlsx]

## Sheet: Sheet1
Supplementary Table 3. Detailed information on the qualitative data.
First author, year	FAZ			superficial capillary plexus (SCP)						deep capillary plexus (DCP)
				Foveal VD			Parafoveal VD			Foveal VD			Parafoveal VD
	MA vs HC	MO vs HC	MA vs MO	MA vs HC	MO vs HC	MA vs MO	MA vs HC	MO vs HC	MA vs MO	MA vs HC	MO vs HC	MA vs MO	MA vs HC	MO vs HC	MA vs MO
Melinda Y. Chang,2017	+	/	/	NA	NA	NA	NA	NA	NA	NA	NA	NA	NA	NA	NA
Mahmut Oğuz Ulusoy,2019	/	/	/	-	-	/	/	/	/	-	-	-	/	/	/
Pınar Bingöl Kızıltunç,2020	/	/	/	NA	NA	NA	NA	NA	NA	NA	NA	NA	NA	NA	NA
Nurdan Gamze Taşlı,2020	NA	+	NA	NA	NA	NA	NA	NA	NA	NA	NA	NA	NA	NA	NA
Özlem Güler,2020	NA	NA	NA	NA	/	NA	NA	/	NA	NA	/	NA	NA	/	NA
Gamze Dereli Can,2020	NA	/	NA	NA	/	NA	NA	/	NA	NA	/	NA	NA	/	NA
Mualla S. Hamurcu,2021	+	NA	NA	NA	NA	NA	NA	NA	NA	NA	NA	NA	NA	NA	NA
Mehmet Hamamci,2021	+	/	/	-	/	/	/	/	/	-	/	/	/	/	/
M. Karahan,2021	/	NA	NA	/	NA	NA	/	NA	NA	/	NA	NA	-	NA	NA
FAZ, foveal avascular zone; VD, vessel density; MA, migraine with aura; MO, migraine without aura; HC, healthy control; NA, not available. “+” stands for the former is significantly greater than the latter;“-” stands for the former is significantly less than the latter; “/” stands for no significant difference.
